# Supplementary material
Source: PubMed Central journal article supplement (PMC9487380)
Supplement: ERR_0011-2013_Disclosures.pdf [file ERR_0011-2013_Disclosures.pdf]

**V Ninane** has received fees for speaking from Olympus.
